# Supplementary material for: Q(lambda)-Based Image Thresholding.
Source: MDPI journal article supplement (doi:10.3390/cancers13153794), 2004-01-01

## Article

# ALBI Score Is A Strong Predictor of Toxicity Following SIRT for Hepatocellular Carcinoma

Céline Lescure <sup>1</sup>, Florian Estrade <sup>1</sup>, Maud Pedrono <sup>1</sup>, Boris Campillo-Gimenez <sup>2</sup>, Samuel Le Sourd <sup>1</sup>, Marc Pracht <sup>1</sup>, Xavier Palard <sup>3</sup>, Héloïse Bourien <sup>1</sup>, Léa Muzellec <sup>1</sup>, Thomas Uguen <sup>4</sup>, Yan Rolland <sup>5</sup>, Etienne Garin <sup>3</sup> and Julien Edeline <sup>1,\*</sup>

## Supplementary materials

Table S1. Scoring system used for C-P in this study

|                       | 1 point      | 2 points                               | 3 points                     |
|-----------------------|--------------|----------------------------------------|------------------------------|
| Albumin               | > 35 g/L     | 35–28 g/L                              | < 28 g/L                     |
| Bilirubin             | < 34 mcmol/L | 34–51 mcmol/L                          | > 51 mcmol/L                 |
| Coagulation:          |              |                                        |                              |
| -INR                  |              |                                        |                              |
| -Prothrombin Time, as | < 1.7        | 1.7–2.3                                | > 2.3                        |
| a percentage relative | > 50%        | 40–50%                                 | < 40%                        |
| to control            |              |                                        |                              |
| Ascites               | None         | Medically controlled                   | Refractory                   |
| Encephalopathy        | None         | Grade 1 or 2 (or medically controlled) | Grade 3 or 4 (or refractory) |

**Table S2.** Causes of death.

| Cause of death                                            | ALBI Grade 1 | ALBI Grade 2 | ALBI Grade 3 |       |
|-----------------------------------------------------------|--------------|--------------|--------------|-------|
|                                                           | n=88         | n=130        | n=4          |       |
| Liver failure due to Selective internal radiation therapy |              | 2            |              |       |
| Liver failure due to cancer progression                   |              | 3            |              |       |
| Liver failure (indeterminate cause)                       |              | 2            |              |       |
| Esophageal varices bleeding                               | 1            |              |              |       |
| Stroke                                                    |              | 1            |              |       |
| Indeterminate cause                                       |              | 2            |              |       |
| Cause of death                                            | C-P A5       | C-P A6       | C-P B        | C-P C |
|                                                           | n=131        | n=70         | n=21         | n=0   |
| Liver failure due to SIRT                                 |              | 2            |              |       |
| Liver failure due to cancer progression                   | 1            | 2            |              |       |
| Liver failure (indeterminate cause)                       | 1            | 1            |              |       |
| Esophageal varices bleeding                               | 1            |              |              |       |
| Stroke                                                    |              | 1            |              |       |
| Indeterminate cause                                       | 2            |              |              |       |

**Figure S1.** – Flow-chart of the study.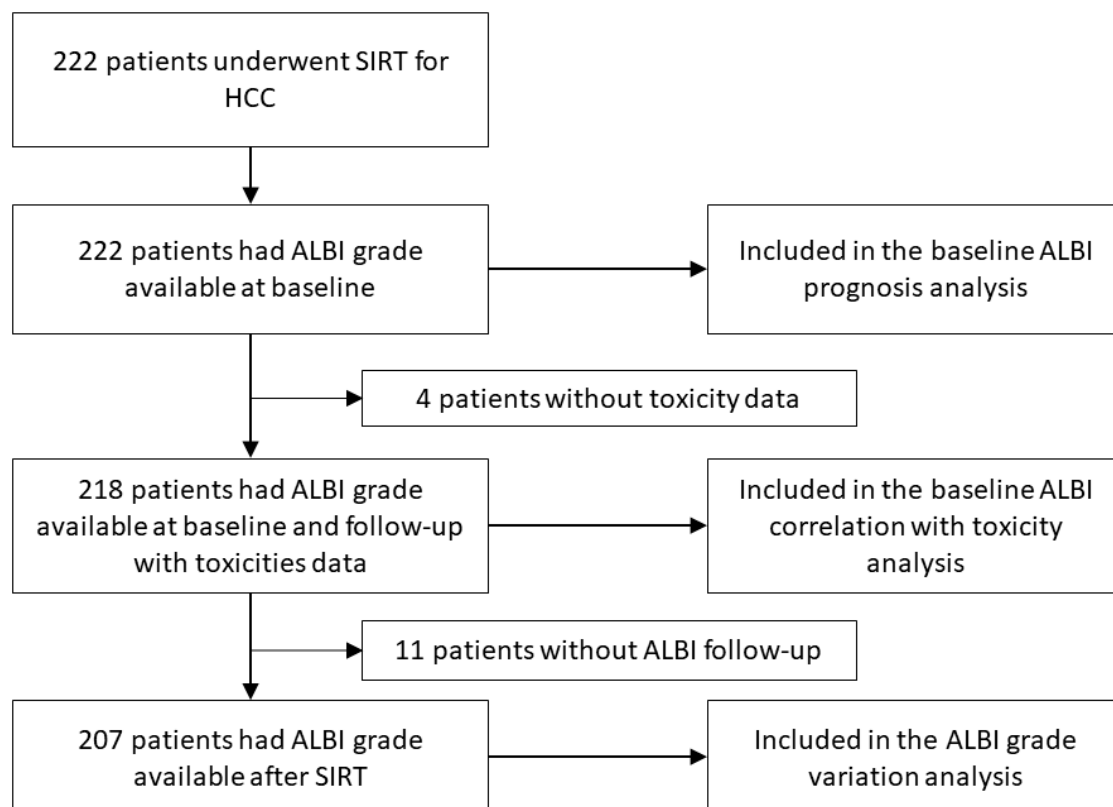

Supplement: s1 [file s1]
